# Supplementary material for: Neutropenia following metamizole use in pediatric patients: a multicenter retrospective study
Source: PubMed Central journal article supplement — Clin Exp Pediatr. 2024 Jul 23;67(8):415–7. doi: 10.3345/cep.2024.00262 (PMC11298770; doi:10.3345/cep.2024.00262), 2024-07-23
Supplement: cep-2024-00262-Supplementary-Table-1.pdf [file cep-2024-00262-Supplementary-Table-1.pdf]

**Supplementary Table 1.** Detailed reporting on metamizole usage and restrictions<sup>1-5)</sup>

| Country        | Status                               | Year of ban (if applicable) | Reason for Ban/status                                                |
|----------------|--------------------------------------|-----------------------------|----------------------------------------------------------------------|
| Morocco        | Banned                               | 2000                        | Severe adverse reactions                                             |
| Australia      | Banned                               | 1965                        | Risk of agranulocytosis                                              |
| United Kingdom | Banned                               | 1974                        | Risk of agranulocytosis                                              |
| Sweden         | Banned                               | 1974, rebanned in 1999      | Risk of agranulocytosis                                              |
| United States  | Banned                               | 1977                        | Risk of agranulocytosis                                              |
| Canada         | Banned                               | 1978                        | Risk of agranulocytosis                                              |
| Japan          | Banned                               | 1980                        | Risk of agranulocytosis                                              |
| South Korea    | Banned                               | 1983                        | Risk of agranulocytosis                                              |
| Nepal          | Banned                               | 1997                        | Safety concerns                                                      |
| Syria          | Banned                               | 1998                        | Anaphylactic shock, agranulocytosis                                  |
| Yemen          | Banned                               | 1998                        | Anaphylactic shock, agranulocytosis                                  |
| Zimbabwe       | Banned                               | 1998                        | Fatal agranulocytosis                                                |
| Iran           | Banned                               | 1980                        | Risk of agranulocytosis                                              |
| India          | Initially banned, ban lifted in 2014 | 2013                        | Risk of agranulocytosis, ban lifted due to demand and further review |
| Germany        | Prescription-only                    | 1983                        | Monitored use due to risk of agranulocytosis                         |
| Spain          | Prescription-only                    | 1989                        | Monitored use due to risk of agranulocytosis                         |
| Israel         | Prescription-only                    | 1985                        | Monitored use due to risk of agranulocytosis                         |
| Finland        | Prescription-only                    | 1992                        | Monitored use due to risk of agranulocytosis                         |
| Switzerland    | Prescription-only                    | 1992                        | Monitored use due to risk of agranulocytosis                         |
| Italy          | Prescription-only                    | 1983                        | Monitored use due to risk of agranulocytosis                         |
| Colombia       | Restricted                           | 2000                        | Available only if other management insufficient                      |
| Brazil         | Over-the-counter                     | -                           | Widely used                                                          |
| Turkey         | Prescription-only                    | -                           | Monitored use due to risk of agranulocytosis                         |
| Russia         | Over-the-counter                     | -                           | Widely used and highly popular                                       |
| Mexico         | Over-the-counter                     | -                           | Widely used and highly popular                                       |
| South Africa   | Prescription-only                    | -                           | Monitored use due to risk of agranulocytosis                         |
| Bulgaria       | Over-the-counter                     | -                           | Widely used and highly popular                                       |
| Romania        | Over-the-counter                     | -                           | Widely used and highly popular                                       |
| Macedonia      | Over-the-counter                     | -                           | Widely used and highly popular                                       |
| Peru           | Over-the-counter                     | -                           | Widely used and highly popular                                       |
| Portugal       | Prescription-only                    | -                           | Monitored use due to risk of agranulocytosis                         |
| Argentina      | Over-the-counter                     | -                           | Widely used and highly popular                                       |
| Uruguay        | Over-the-counter                     | -                           | Widely used and highly popular                                       |
| Venezuela      | Over-the-counter                     | -                           | Widely used and highly popular                                       |
| China          | Over-the-counter                     | -                           | Widely used and highly popular                                       |
| Serbia         | Over-the-counter                     | -                           | Widely used and highly popular                                       |
| Croatia        | Over-the-counter                     | -                           | Widely used and highly popular                                       |
| Slovenia       | Over-the-counter                     | -                           | Widely used and highly popular                                       |

**Supplementary References**

1. United Nations Department of Economic and Social Affairs. Consolidated list of products whose consumption and/or sale have been banned, withdrawn, severely restricted or not approved by governments. New York: United Nations; 2009:ix, 65.
2. Martínez-Martín P, Raffaelli E Jr, Titus F, Despuig J, Fragoso YD, Díez-Tejedor E, et al. Efficacy and safety of metamizole vs. acetylsalicylic acid in patients with moderate episodic tension-type headache: a randomized, double-blind, placebo- and active-controlled, multicentre study. *Cephalalgia* 2001;21:604-10.
3. Stromer W, Palladini M. Metamizole: a comprehensive approach to its benefit–risk profile. *Evid Self Med* 2022;2:220153.
4. Metamizole [Internet]. Wikipedia; 2024 [2024 May 22]. Available from: <https://en.wikipedia.org/wiki/Metamizole>.
5. Day A. Nolotil: patients' families demand ban of controversial painkiller. *HuffPost UK* [Internet]. 2019 Jun 16 [cited 2024 May 22]. Available from: [https://www.huffingtonpost.co.uk/entry/this-controversial-painkiller-could-be-linked-to-the-deaths-of-brits-in-spain-now-families-want-it-banned\\_uk\\_5cdd5660e4b09648227bd9f6](https://www.huffingtonpost.co.uk/entry/this-controversial-painkiller-could-be-linked-to-the-deaths-of-brits-in-spain-now-families-want-it-banned_uk_5cdd5660e4b09648227bd9f6).
